# Supplementary material
Source: Research Square preprint supplement (doi:10.21203/rs.3.rs-9179108/v1)
Supplement: Supplementary file 1 [file 1ac7f7b202e72c4f13673768.xlsx]

## Sheet: cTIV (bilateral)
Structural Whole Brain
Name1	Name2			Redundancies in UVA	Total redundancy
Substantia_nigra_pars_reticulata_L	Substantia_nigra_pars_compacta_L		Bilateral	0.382353	0.168831
Substantia_nigra_pars_reticulata_R	Substantia_nigra_pars_reticulata_L		Unilateral	0.617647	0.253247
Putamen_L	Putamen_R		13 homotopic regions
Caudate_L	Caudate_R
Nucleus_Accumbens_L	Nucleus_Accumbens_R
Globus_pallidus_externalis_L	Globus_pallidus_externalis_R
Globus_pallidus_internalis_L	Globus_pallidus_internalis_R
Substantia_nigra_pars_reticulata_R	Substantia_nigra_pars_compacta_R
Area_31pd_L	Area_31p_ventral_L
Dorsal_Transitional_Visual_Area_L	Parieto-Occipital_Sulcus_Area_2_L
Area_10r_L	V Area_10v_L
Anterior_24_prime_L	Area_anterior_32_prime_L
Area_10r_L	Area_p32_L
Anterior_24_prime_L	Area_p32_prime_L
Area_posterior_47r_L	Area_anterior_9-46v_L
Area_IFSp_L	Area_posterior_9-46v_L
Area_23d_L	Area_23d_R
Area_31p_ventral_R	Area_31a_R
Area_31p_ventral_R	Area_31pd_R
Dorsal_Transitional_Visual_Area_R	Parieto-Occipital_Sulcus_Area_2_R
ProStriate_Area_L	ProStriate_Area_R
Area_10r_R	Area_10v_R
V Area_25_L	Area_25_R
Area_anterior_32_prime_R	Area_p32_prime_R
Area_44_R	Area_45_R
Hippocampus_L	Hippocampus_R
Entorhinal_Cortex_R	Perirhinal_Ectorhinal_Cortex_R
ParaHippocampal_Area_2_R	ParaHippocampal_Area_3_R
Amygdala_L	Amygdala_R
Entorhinal_Cortex_L	Perirhinal_Ectorhinal_Cortex_L
ParaHippocampal_Area_3_L	ParaHippocampal_Area_1_L
ParaHippocampal_Area_3_L	ParaHippocampal_Area_2_L
Orbital_Frontal_Complex_L	Orbital_Frontal_Complex_R
Posterior_OFC_Complex_L	posterior_OFC_Complex_R

## Sheet: cTIV_MEAN
Structural MEAN
Name1	Name2
Nucleus_Accumbens	Putamen
Nucleus_Accumbens	Caudate
Globus_pallidus_externalis	Globus_pallidus_internalis
Substantia_nigra_pars_compacta	Substantia_nigra_pars_reticulata
Area_31pd	Area_31p_ventral
Dorsal_Transitional_Visual_Area	Parieto-Occipital_Sulcus_Area_1
Dorsal_Transitional_Visual_Area	Parieto-Occipital_Sulcus_Area_2
Area_10r	Area_10v
Area_a24	Area_posterior_24
Area_anterior_32_prime	Area_p32_prime
Area_9_anterior	Area_9_Posterior
Area_posterior_47r	Area_anterior_9-46v
Area_IFSp	Area_posterior_9-46v
Area_8Ad	Superior_6-8_Transitional_Area
Area_44	Area_45
Area_IFJa	Area_IFJp
Hippocampus	Amygdala
Entorhinal_Cortex	Perirhinal_Ectorhinal_Cortex
ParaHippocampal_Area_3	ParaHippocampal_Area_1
ParaHippocampal_Area_3	ParaHippocampal_Area_2
Area_11l	Area_13l
Posterior_OFC_Complex	Orbital_Frontal_Complex

## Sheet: non-cTIV (bilateral)
Uncorrected structural Whole Brain
Name1	Name2
Substantia_nigra_pars_reticulata_R	Substantia_nigra_pars_reticulata_L			Redundancies in UVA	Total redundancy
Putamen_L	Putamen_R		Bilateral	0.451613	0.181818
Caudate_L	Caudate_R		Unilateral	0.548387	0.207792
Nucleus_Accumbens_L	Nucleus_Accumbens_R		14 homotopic regions
Globus_pallidus_externalis_L	Globus_pallidus_externalis_R
Globus_pallidus_internalis_L	Globus_pallidus_internalis_R
Substantia_nigra_pars_reticulata_R	Substantia_nigra_pars_compacta_R
Area_31pd_L	Area_31p_ventral_L
Dorsal_Transitional_Visual_Area_L	Parieto-Occipital_Sulcus_Area_2_L
Anterior_24_prime_L	Area_anterior_32_prime_L
Area_10r_L	Area_p32_L
Anterior_24_prime_L	Area_p32_prime_L
Area_IFSp_L	Area_posterior_9-46v_L
Area_23d_L	Area_23d_R
Area_31p_ventral_R	Area_31a_R
Area_31p_ventral_R	Area_31pd_R
Dorsal_Transitional_Visual_Area_R	Parieto-Occipital_Sulcus_Area_2_R
ProStriate_Area_L	ProStriate_Area_R
Area_10r_R	Area_10v_R
Area_25_L	Area_25_R
Area_anterior_32_prime_R	Area_p32_prime_R
Area_44_R	Area_45_R
Hippocampus_L	Hippocampus_R
PreSubiculum_L	PreSubiculum_R
Entorhinal_Cortex_R	Perirhinal_Ectorhinal_Cortex_R
ParaHippocampal_Area_2_R	ParaHippocampal_Area_3_R
Amygdala_L	Amygdala_R
Entorhinal_Cortex_L	Perirhinal_Ectorhinal_Cortex_L
ParaHippocampal_Area_2_L	ParaHippocampal_Area_3_L
Orbital_Frontal_Complex_L	Orbital_Frontal_Complex_R
Posterior_OFC_Complex_L	posterior_OFC_Complex_R

## Sheet: non-cTIV_MEAN
Uncorrected structural MEAN
Name1	Name2
Caudate	Nucleus_Accumbens
Globus_pallidus_externalis	Globus_pallidus_internalis
Substantia_nigra_pars_compacta	Substantia_nigra_pars_reticulata
Area_31pd	Area_31p_ventral
Dorsal_Transitional_Visual_Area	Parieto-Occipital_Sulcus_Area_1
Dorsal_Transitional_Visual_Area	Parieto-Occipital_Sulcus_Area_2
Area_10r	Area_10v
Area_a24	Area_posterior_24
Area_anterior_32_prime	Area_p32_prime
Area_posterior_47r	Area_anterior_9-46v
Area_IFSp	Area_posterior_9-46v
Area_44	Area_45
Area_IFJa	Area_IFJp
Hippocampus	Amygdala
Entorhinal_Cortex	Perirhinal_Ectorhinal_Cortex
ParaHippocampal_Area_2	ParaHippocampal_Area_3
Posterior_OFC_Complex	Orbital_Frontal_Complex

## Sheet: fMRI (bilateral)
Functional Whole Brain
Name1	Name2			Redundancies in UVA	Total redundancy
Globus_pallidus_externalis_R	Globus_pallidus_externalis_L		Bilateral	0.611111	0.142857
Globus_pallidus_externalis_L	Globus_pallidus_internalis_L		Unilateral	0.388889	0.0909091
Globus_pallidus_internalis_R	Globus_pallidus_internalis_L		11 homotopic regions
Putamen_L	Putamen_R
Globus_pallidus_externalis_R	Globus_pallidus_internalis_R
Substantia_nigra_pars_compacta_L	Substantia_nigra_pars_compacta_R
Substantia_nigra_pars_reticulata_L	Substantia_nigra_pars_reticulata_R
Ventral_tegmenta_area_L	Ventral_tegmenta_area_R
Area_25_L	Area_25_R
Area_a24_L	Area_a24_R
Area_23d_R	Area_Posterior_24_prime_R
Area_8Av_R	Inferior_6-8_Transitional_Area_R
Superior_Frontal_Language_Area_L	Superior_Frontal_Language_Area_R
Septal_nucleus_L	Septal_nucleus_R
Entorhinal_Cortex_L	Perirhinal_Ectorhinal_Cortex_L
Area_11l_L	Area_anterior_10p_L
Area_10d_L	Area_posterior_10p_L
Orbital_Frontal_Complex_L	Orbital_Frontal_Complex_R

## Sheet: fMRI_MEAN
Functional MEAN
Name1	Name2
Globus_pallidus_externalis	Globus_pallidus_internalis
Substantia_nigra_pars_compacta	Substantia_nigra_pars_reticulata
Area_p32	Area_10r
Area_p32	Area_a24
Area_23d	Area_Posterior_24_prime
Area_8Av	Inferior_6-8_Transitional_Area
Nucleus_Accumbens	Septal_nucleus
Entorhinal_Cortex	Perirhinal_Ectorhinal_Cortex
ParaHippocampal_Area_1	ParaHippocampal_Area_3
V Area_10v	Polar_10p
Area_10d	Area_posterior_10p
