# Supplementary material
Source: Research Square preprint supplement (doi:10.21203/rs.3.rs-9179108/v1)
Supplement: Supplementary file 2 [file 38fa40e9246fab3bc81936db.xlsx]

## Sheet: cTIV (bilateral)
items	dimension	Dimension average interhemispheric redundancy	Total average Interhemispheric redundancy
Hippocampus_L	1	1	0.989767
PreSubiculum_L	1
Entorhinal_Cortex_L	1
Perirhinal_Ectorhinal_Cortex_L	1
ParaHippocampal_Area_1_L	1
ParaHippocampal_Area_2_L	1
ParaHippocampal_Area_3_L	1
Hippocampus_R	1
PreSubiculum_R	1
Entorhinal_Cortex_R	1
Perirhinal_Ectorhinal_Cortex_R	1
ParaHippocampal_Area_1_R	1
ParaHippocampal_Area_2_R	1
ParaHippocampal_Area_3_R	1
Amygdala_L	1
Amygdala_R	1
Globus_pallidus_externalis_L	10	1
Globus_pallidus_internalis_L	10
Substantia_nigra_pars_compacta_L	10
Substantia_nigra_pars_reticulata_L	10
Ventral_tegmenta_area_L	10
Globus_pallidus_externalis_R	10
Globus_pallidus_internalis_R	10
Substantia_nigra_pars_compacta_R	10
Substantia_nigra_pars_reticulata_R	10
Ventral_tegmenta_area_R	10
Area_23d_L	2	1
Area_31a_L	2
Area_31pd_L	2
Area_31p_ventral_L	2
Area_7m_L	2
Area_dorsal_23_a+b_L	2
PreCuneus_Visual_Area_L	2
RetroSplenial_Complex_L	2
Area_ventral_23_a+b_L	2
Area_23d_R	2
Area_31a_R	2
Area_31pd_R	2
Area_31p_ventral_R	2
Area_7m_R	2
Area_dorsal_23_a+b_R	2
PreCuneus_Visual_Area_R	2
RetroSplenial_Complex_R	2
Area_ventral_23_a+b_R	2
Dorsal_Transitional_Visual_Area_L	3	1
Parieto-Occipital_Sulcus_Area_1_L	3
Parieto-Occipital_Sulcus_Area_2_L	3
ProStriate_Area_L	3
Dorsal_Transitional_Visual_Area_R	3
Parieto-Occipital_Sulcus_Area_1_R	3
Parieto-Occipital_Sulcus_Area_2_R	3
ProStriate_Area_R	3
Area_10r_L	4	1
Area_10v_L	4
Area_25_L	4
Area_p32_L	4
Posterior_OFC_Complex_L	4
Area_s32_L	4
Orbital_Frontal_Complex_L	4
Area_10r_R	4
Area_10v_R	4
Area_25_R	4
Area_p32_R	4
posterior_OFC_Complex_R	4
Area_s32_R	4
Orbital_Frontal_Complex_R	4
Area_33_prime_L	5	0.947368
Area_8BM_L	5
Area_a24_L	5
Anterior_24_prime_L	5
Area_anterior_32_prime_L	5
Area_dorsal_32_L	5
Area_posterior_24_L	5
Area_Posterior_24_prime_L	5
Area_p32_prime_L	5
Area_33_prime_R	5
Area_8BM_R	5
Area_9_Middle_R	5
Area_a24_R	5
Anterior_24_prime_R	5
Area_anterior_32_prime_R	5
Area_dorsal_32_R	5
Area_posterior_24_R	5
Area_Posterior_24_prime_R	5
Area_p32_prime_R	5
Area_9_Middle_L	6	0.952381
Area_10d_L	6
Polar_10p_L	6
Area_anterior_10p_L	6
Area_posterior_10p_L	6
Area_8Ad_L	6
Area_8B_Lateral_L	6
Area_9_anterior_L	6
Area_9_Posterior_L	6
Superior_6-8_Transitional_Area_L	6
Superior_Frontal_Language_Area_L	6
Area_10d_R	6
Polar_10p_R	6
Area_anterior_10p_R	6
Area_posterior_10p_R	6
Area_8Ad_R	6
Area_8B_Lateral_R	6
Area_9_anterior_R	6
Area_9_Posterior_R	6
Superior_6-8_Transitional_Area_R	6
Superior_Frontal_Language_Area_R	6
Area_11l_L	7	1
Area_13l_L	7
Area_47m_L	7
Area_47s_L	7
Area_47l_(47_lateral)_L	7
Area_anterior_47r_L	7
Area_11l_R	7
Area_13l_R	7
Area_47m_R	7
Area_47s_R	7
Area_47l_(47_lateral)_R	7
Area_anterior_47r_R	7
Area_44_L	8	1
Area_45_L	8
Area_IFJa_L	8
Area_IFJp_L	8
Area_IFSa_L	8
Area_IFSp_L	8
Area_posterior_47r_L	8
Area_46_L	8
Area_8Av_L	8
Area_8C_L	8
Area_9-46d_L	8
Area_anterior_9-46v_L	8
Inferior_6-8_Transitional_Area_L	8
Area_posterior_9-46v_L	8
Area_44_R	8
Area_45_R	8
Area_IFJa_R	8
Area_IFJp_R	8
Area_IFSa_R	8
Area_IFSp_R	8
Area_posterior_47r_R	8
Area_46_R	8
Area_8Av_R	8
Area_8C_R	8
Area_9-46d_R	8
Area_anterior_9-46v_R	8
Inferior_6-8_Transitional_Area_R	8
Area_posterior_9-46v_R	8
Putamen_L	9	1
Caudate_L	9
Nucleus_Accumbens_L	9
Septal_nucleus_L	9
Putamen_R	9
Caudate_R	9
Nucleus_Accumbens_R	9
Septal_nucleus_R	9

## Sheet: cTIV_MEAN
items	dimension
Hippocampus	1
PreSubiculum	1
Entorhinal_Cortex	1
Perirhinal_Ectorhinal_Cortex	1
ParaHippocampal_Area_1	1
ParaHippocampal_Area_2	1
ParaHippocampal_Area_3	1
Amygdala	1
Area_23d	2
Area_31a	2
Area_31pd	2
Area_31p_ventral	2
Area_7m	2
Area_dorsal_23_a+b	2
PreCuneus_Visual_Area	2
RetroSplenial_Complex	2
Area_ventral_23_a+b	2
Dorsal_Transitional_Visual_Area	3
Parieto-Occipital_Sulcus_Area_1	3
Parieto-Occipital_Sulcus_Area_2	3
ProStriate_Area	3
Area_10r	4
Area_10v	4
Area_p32	4
Area_s32	4
Area_10d	4
Polar_10p	4
Area_anterior_10p	4
Area_posterior_10p	4
Area_25	5
Area_33_prime	5
Area_8BM	5
Area_9_Middle	5
Area_a24	5
Anterior_24_prime	5
Area_anterior_32_prime	5
Area_dorsal_32	5
Area_posterior_24	5
Area_Posterior_24_prime	5
Area_p32_prime	5
Posterior_OFC_Complex	6
Area_11l	6
Area_13l	6
Area_47m	6
Area_47s	6
Orbital_Frontal_Complex	6
Area_47l_(47_lateral)	6
Area_anterior_47r	6
Area_posterior_47r	6
Area_anterior_9-46v	6
Area_44	7
Area_45	7
Area_IFJa	7
Area_IFJp	7
Area_IFSa	7
Area_IFSp	7
Area_46	7
Area_8Av	7
Area_8C	7
Area_9-46d	7
Inferior_6-8_Transitional_Area	7
Area_posterior_9-46v	7
Area_8Ad	8
Area_8B_Lateral	8
Area_9_anterior	8
Area_9_Posterior	8
Superior_6-8_Transitional_Area	8
Superior_Frontal_Language_Area	8
Putamen	9
Caudate	9
Nucleus_Accumbens	9
Globus_pallidus_externalis	9
Globus_pallidus_internalis	9
Substantia_nigra_pars_compacta	9
Substantia_nigra_pars_reticulata	9
Ventral_tegmenta_area	9
Septal_nucleus	9

## Sheet: cTIV_MEAN_bootstrap
items	dimension
Hippocampus	1
PreSubiculum	1
Entorhinal_Cortex	1
Perirhinal_Ectorhinal_Cortex	1
ParaHippocampal_Area_1	1
ParaHippocampal_Area_2	1
ParaHippocampal_Area_3	1
Amygdala	1
Area_23d	2
Area_31a	2
Area_31pd	2
Area_31p_ventral	2
Area_7m	2
Area_dorsal_23_a+b	2
PreCuneus_Visual_Area	2
RetroSplenial_Complex	2
Area_ventral_23_a+b	2
Dorsal_Transitional_Visual_Area	3
Parieto-Occipital_Sulcus_Area_1	3
Parieto-Occipital_Sulcus_Area_2	3
Area_10r	4
Area_10v	4
Area_p32	4
Area_s32	4
Area_10d	4
Polar_10p	4
Area_anterior_10p	4
Area_posterior_10p	4
Area_25	5
Area_33_prime	5
Area_8BM	5
Area_9_Middle	5
Area_a24	5
Anterior_24_prime	5
Area_anterior_32_prime	5
Area_dorsal_32	5
Area_posterior_24	5
Area_Posterior_24_prime	5
Area_p32_prime	5
Area_11l	6
Area_13l	6
Area_47m	6
Area_47s	6
Area_47l_(47_lateral)	6
Area_anterior_47r	6
Area_44	7
Area_45	7
Area_IFJa	7
Area_IFJp	7
Area_IFSa	7
Area_IFSp	7
Area_46	7
Area_8Av	7
Area_8C	7
Inferior_6-8_Transitional_Area	7
Area_posterior_9-46v	7
Area_8Ad	8
Area_8B_Lateral	8
Area_9_anterior	8
Area_9_Posterior	8
Superior_6-8_Transitional_Area	8
Superior_Frontal_Language_Area	8
Putamen	9
Caudate	9
Nucleus_Accumbens	9
Globus_pallidus_externalis	9
Globus_pallidus_internalis	9
Substantia_nigra_pars_compacta	9
Substantia_nigra_pars_reticulata	9
Ventral_tegmenta_area	9
Septal_nucleus	9

## Sheet: non-cTIV (bilateral)
items	dimension	Dimension average interhemispheric redundancy	Total average Interhemispheric redundancy
Hippocampus_L	1	1	0.991559
PreSubiculum_L	1
Entorhinal_Cortex_L	1
Perirhinal_Ectorhinal_Cortex_L	1
ParaHippocampal_Area_1_L	1
ParaHippocampal_Area_2_L	1
ParaHippocampal_Area_3_L	1
ProStriate_Area_L	1
Hippocampus_R	1
PreSubiculum_R	1
Entorhinal_Cortex_R	1
Perirhinal_Ectorhinal_Cortex_R	1
ParaHippocampal_Area_1_R	1
ParaHippocampal_Area_2_R	1
ParaHippocampal_Area_3_R	1
ProStriate_Area_R	1
Amygdala_L	1
Amygdala_R	1
Putamen_L	10	1
Caudate_L	10
Nucleus_Accumbens_L	10
Septal_nucleus_L	10
Putamen_R	10
Caudate_R	10
Nucleus_Accumbens_R	10
Septal_nucleus_R	10
Globus_pallidus_externalis_L	11	1
Globus_pallidus_internalis_L	11
Substantia_nigra_pars_compacta_L	11
Substantia_nigra_pars_reticulata_L	11
Ventral_tegmenta_area_L	11
Globus_pallidus_externalis_R	11
Globus_pallidus_internalis_R	11
Substantia_nigra_pars_compacta_R	11
Substantia_nigra_pars_reticulata_R	11
Ventral_tegmenta_area_R	11
Area_23d_L	2	0.956522
Area_25_L	2
Area_33_prime_L	2
Area_8BM_L	2
Area_a24_L	2
Anterior_24_prime_L	2
Area_anterior_32_prime_L	2
Area_dorsal_32_L	2
Area_posterior_24_L	2
Area_Posterior_24_prime_L	2
Area_p32_prime_L	2
Area_23d_R	2
Area_25_R	2
Area_33_prime_R	2
Area_8BM_R	2
Area_9_Middle_R	2
Area_a24_R	2
Anterior_24_prime_R	2
Area_anterior_32_prime_R	2
Area_dorsal_32_R	2
Area_posterior_24_R	2
Area_Posterior_24_prime_R	2
Area_p32_prime_R	2
Area_31a_L	3	1
Area_31pd_L	3
Area_31p_ventral_L	3
Area_7m_L	3
Area_dorsal_23_a+b_L	3
PreCuneus_Visual_Area_L	3
RetroSplenial_Complex_L	3
Area_ventral_23_a+b_L	3
Area_31a_R	3
Area_31pd_R	3
Area_31p_ventral_R	3
Area_7m_R	3
Area_dorsal_23_a+b_R	3
PreCuneus_Visual_Area_R	3
RetroSplenial_Complex_R	3
Area_ventral_23_a+b_R	3
Dorsal_Transitional_Visual_Area_L	4	1
Parieto-Occipital_Sulcus_Area_1_L	4
Parieto-Occipital_Sulcus_Area_2_L	4
Dorsal_Transitional_Visual_Area_R	4
Parieto-Occipital_Sulcus_Area_1_R	4
Parieto-Occipital_Sulcus_Area_2_R	4
Area_10r_L	5	0.952381
Area_10v_L	5
Area_9_Middle_L	5
Area_p32_L	5
Area_s32_L	5
Area_10d_L	5
Polar_10p_L	5
Area_anterior_10p_L	5
Area_posterior_10p_L	5
Area_9_anterior_L	5
Area_9_Posterior_L	5
Area_10r_R	5
Area_10v_R	5
Area_p32_R	5
Area_s32_R	5
Area_10d_R	5
Polar_10p_R	5
Area_anterior_10p_R	5
Area_posterior_10p_R	5
Area_9_anterior_R	5
Area_9_Posterior_R	5
Posterior_OFC_Complex_L	6	1
Orbital_Frontal_Complex_L	6
Posterior_OFC_Complex_R	6
Orbital_Frontal_Complex_R	6
Area_11l_L	7	1
Area_13l_L	7
Area_47m_L	7
Area_47s_L	7
Area_47l_(47_lateral)_L	7
Area_anterior_47r_L	7
Area_11l_R	7
Area_13l_R	7
Area_47m_R	7
Area_47s_R	7
Area_47l_(47_lateral)_R	7
Area_anterior_47r_R	7
Area_44_L	8	1
Area_45_L	8
Area_IFJa_L	8
Area_IFJp_L	8
Area_IFSa_L	8
Area_IFSp_L	8
Area_posterior_47r_L	8
Area_46_L	8
Area_8Av_L	8
Area_8C_L	8
Area_9-46d_L	8
Area_anterior_9-46v_L	8
Inferior_6-8_Transitional_Area_L	8
Area_posterior_9-46v_L	8
Area_44_R	8
Area_45_R	8
Area_IFJa_R	8
Area_IFJp_R	8
Area_IFSa_R	8
Area_IFSp_R	8
Area_posterior_47r_R	8
Area_46_R	8
Area_8Av_R	8
Area_8C_R	8
Area_9-46d_R	8
Area_anterior_9-46v_R	8
Inferior_6-8_Transitional_Area_R	8
Area_posterior_9-46v_R	8
Area_8Ad_L	9	1
Area_8B_Lateral_L	9
Superior_6-8_Transitional_Area_L	9
Superior_Frontal_Language_Area_L	9
Area_8Ad_R	9
Area_8B_Lateral_R	9
Superior_6-8_Transitional_Area_R	9
Superior_Frontal_Language_Area_R	9

## Sheet: non-cTIV_MEAN
items	dimension
Hippocampus	1
PreSubiculum	1
Entorhinal_Cortex	1
Perirhinal_Ectorhinal_Cortex	1
ParaHippocampal_Area_1	1
ParaHippocampal_Area_2	1
ParaHippocampal_Area_3	1
ProStriate_Area	1
Amygdala	1
Area_23d	2
Area_31a	2
Area_31pd	2
Area_31p_ventral	2
Area_7m	2
Area_dorsal_23_a+b	2
PreCuneus_Visual_Area	2
RetroSplenial_Complex	2
Area_ventral_23_a+b	2
Dorsal_Transitional_Visual_Area	3
Parieto-Occipital_Sulcus_Area_1	3
Parieto-Occipital_Sulcus_Area_2	3
Area_10r	4
Area_10v	4
Area_p32	4
Area_s32	4
Area_10d	4
Polar_10p	4
Area_anterior_10p	4
Area_posterior_10p	4
Area_25	5
Area_33_prime	5
Area_8BM	5
Area_9_Middle	5
Area_a24	5
Anterior_24_prime	5
Area_anterior_32_prime	5
Area_dorsal_32	5
Area_posterior_24	5
Area_Posterior_24_prime	5
Area_p32_prime	5
Posterior_OFC_Complex	6
Area_11l	6
Area_13l	6
Area_47m	6
Area_47s	6
Orbital_Frontal_Complex	6
Area_47l_(47_lateral)	6
Area_anterior_47r	6
Area_posterior_47r	6
Area_anterior_9-46v	6
Area_44	7
Area_45	7
Area_IFJa	7
Area_IFJp	7
Area_IFSa	7
Area_IFSp	7
Area_posterior_9-46v	7
Area_46	8
Area_8Ad	8
Area_8Av	8
Area_8B_Lateral	8
Area_8C	8
Area_9-46d	8
Area_9_anterior	8
Area_9_Posterior	8
Inferior_6-8_Transitional_Area	8
Superior_6-8_Transitional_Area	8
Superior_Frontal_Language_Area	8
Putamen	9
Caudate	9
Nucleus_Accumbens	9
Globus_pallidus_externalis	9
Globus_pallidus_internalis	9
Substantia_nigra_pars_compacta	9
Substantia_nigra_pars_reticulata	9
Ventral_tegmenta_area	9
Septal_nucleus	9

## Sheet: fMRI (bilateral)
items	dimension	Dimension average interhemispheric redundancy	Total average Interhemispheric redundancy
Hippocampus_L	1	1	0.917728
PreSubiculum_L	1
ParaHippocampal_Area_1_L	1
ParaHippocampal_Area_2_L	1
ParaHippocampal_Area_3_L	1
ProStriate_Area_L	1
Hippocampus_R	1
PreSubiculum_R	1
ParaHippocampal_Area_1_R	1
ParaHippocampal_Area_2_R	1
ParaHippocampal_Area_3_R	1
ProStriate_Area_R	1
Entorhinal_Cortex_L	2	1
Perirhinal_Ectorhinal_Cortex_L	2
Entorhinal_Cortex_R	2
Perirhinal_Ectorhinal_Cortex_R	2
Area_23d_L	3	0.956522
Area_31a_L	3
Area_31pd_L	3
Area_31p_ventral_L	3
Area_7m_L	3
Area_dorsal_23_a+b_L	3
Dorsal_Transitional_Visual_Area_L	3
PreCuneus_Visual_Area_L	3
Parieto-Occipital_Sulcus_Area_1_L	3
Parieto-Occipital_Sulcus_Area_2_L	3
RetroSplenial_Complex_L	3
Area_ventral_23_a+b_L	3
Area_31a_R	3
Area_31pd_R	3
Area_31p_ventral_R	3
Area_7m_R	3
Area_dorsal_23_a+b_R	3
Dorsal_Transitional_Visual_Area_R	3
PreCuneus_Visual_Area_R	3
Parieto-Occipital_Sulcus_Area_1_R	3
Parieto-Occipital_Sulcus_Area_2_R	3
RetroSplenial_Complex_R	3
Area_ventral_23_a+b_R	3
Area_10r_L	4	1
Area_a24_L	4
Area_p32_L	4
Area_s32_L	4
Area_10r_R	4
Area_a24_R	4
Area_p32_R	4
Area_s32_R	4
Area_10v_L	5	0.777778
Area_10d_L	5
Polar_10p_L	5
Area_11l_L	5
Area_anterior_10p_L	5
Orbital_Frontal_Complex_L	5
Area_posterior_10p_L	5
Area_10v_R	5
Area_10d_R	5
Polar_10p_R	5
Area_11l_R	5
Area_47m_R	5
Area_anterior_10p_R	5
Orbital_Frontal_Complex_R	5
Area_posterior_10p_R	5
Area_47l_(47_lateral)_R	5
Area_anterior_47r_R	5
Area_posterior_47r_R	5
Area_25_L	6	1
Posterior_OFC_Complex_L	6
Area_13l_L	6
Area_47s_L	6
Area_25_R	6
posterior_OFC_Complex_R	6
Area_13l_R	6
Area_47s_R	6
Nucleus_Accumbens_L	6
Amygdala_L	6
Septal_nucleus_L	6
Nucleus_Accumbens_R	6
Amygdala_R	6
Septal_nucleus_R	6
Area_33_prime_L	7	0.827586
Area_8BM_L	7
Area_9_Middle_L	7
Anterior_24_prime_L	7
Area_anterior_32_prime_L	7
Area_dorsal_32_L	7
Area_posterior_24_L	7
Area_Posterior_24_prime_L	7
Area_p32_prime_L	7
Area_IFJa_L	7
Area_IFJp_L	7
Area_8Ad_L	7
Area_23d_R	7
Area_33_prime_R	7
Area_8BM_R	7
Area_9_Middle_R	7
Anterior_24_prime_R	7
Area_anterior_32_prime_R	7
Area_dorsal_32_R	7
Area_posterior_24_R	7
Area_Posterior_24_prime_R	7
Area_p32_prime_R	7
Area_44_R	7
Area_IFJa_R	7
Area_IFJp_R	7
Area_IFSa_R	7
Area_IFSp_R	7
Area_8Ad_R	7
Area_9-46d_R	7
Area_47m_L	8	0.75
Area_44_L	8
Area_45_L	8
Area_47l_(47_lateral)_L	8
Area_anterior_47r_L	8
Area_IFSa_L	8
Area_IFSp_L	8
Area_posterior_47r_L	8
Area_46_L	8
Area_8Av_L	8
Area_8B_Lateral_L	8
Area_8C_L	8
Area_9-46d_L	8
Area_9_anterior_L	8
Area_9_Posterior_L	8
Area_anterior_9-46v_L	8
Inferior_6-8_Transitional_Area_L	8
Area_posterior_9-46v_L	8
Superior_6-8_Transitional_Area_L	8
Superior_Frontal_Language_Area_L	8
Area_45_R	8
Area_46_R	8
Area_8Av_R	8
Area_8B_Lateral_R	8
Area_8C_R	8
Area_9_anterior_R	8
Area_9_Posterior_R	8
Area_anterior_9-46v_R	8
Inferior_6-8_Transitional_Area_R	8
Area_posterior_9-46v_R	8
Superior_6-8_Transitional_Area_R	8
Superior_Frontal_Language_Area_R	8
Putamen_L	9	1
Caudate_L	9
Globus_pallidus_externalis_L	9
Globus_pallidus_internalis_L	9
Substantia_nigra_pars_compacta_L	9
Substantia_nigra_pars_reticulata_L	9
Ventral_tegmenta_area_L	9
Putamen_R	9
Caudate_R	9
Globus_pallidus_externalis_R	9
Globus_pallidus_internalis_R	9
Substantia_nigra_pars_compacta_R	9
Substantia_nigra_pars_reticulata_R	9
Ventral_tegmenta_area_R	9

## Sheet: fMRI_MEAN
items	dimension
Hippocampus	1
PreSubiculum	1
ParaHippocampal_Area_1	1
ParaHippocampal_Area_2	1
ParaHippocampal_Area_3	1
Entorhinal_Cortex	2
Perirhinal_Ectorhinal_Cortex	2
Area_31a	2
Area_31pd	2
Area_31p_ventral	2
Area_7m	2
Area_dorsal_23_a+b	2
Dorsal_Transitional_Visual_Area	2
PreCuneus_Visual_Area	2
Parieto-Occipital_Sulcus_Area_1	2
Parieto-Occipital_Sulcus_Area_2	2
ProStriate_Area	2
RetroSplenial_Complex	2
Area_ventral_23_a+b	2
Area_23d	3
Area_33_prime	3
Area_8BM	3
Area_9_Middle	3
Anterior_24_prime	3
Area_anterior_32_prime	3
Area_dorsal_32	3
Area_posterior_24	3
Area_Posterior_24_prime	3
Area_p32_prime	3
Area_47m	3
Area_44	3
Area_IFJa	3
Area_IFJp	3
Area_IFSa	3
Area_IFSp	3
Area_posterior_47r	3
Area_8Ad	3
Area_8C	3
Area_10r	4
Area_10v	4
Area_a24	4
Area_p32	4
Area_s32	4
Area_10d	4
Polar_10p	4
Area_11l	4
Area_13l	4
Area_47s	4
Area_anterior_10p	4
Orbital_Frontal_Complex	4
Area_posterior_10p	4
Area_25	5
Posterior_OFC_Complex	5
Nucleus_Accumbens	5
Amygdala	5
Septal_nucleus	5
Area_45	6
Area_47l_(47_lateral)	6
Area_anterior_47r	6
Area_46	7
Area_8Av	7
Area_8B_Lateral	7
Area_9-46d	7
Area_9_anterior	7
Area_9_Posterior	7
Area_anterior_9-46v	7
Inferior_6-8_Transitional_Area	7
Area_posterior_9-46v	7
Superior_6-8_Transitional_Area	7
Superior_Frontal_Language_Area	7
Putamen	8
Caudate	8
Globus_pallidus_externalis	8
Globus_pallidus_internalis	8
Substantia_nigra_pars_compacta	8
Substantia_nigra_pars_reticulata	8
Ventral_tegmenta_area	8

## Sheet: fMRI_MEAN_bootstrap
items	dimension
Hippocampus	1
PreSubiculum	1
ParaHippocampal_Area_1	1
ParaHippocampal_Area_2	1
ParaHippocampal_Area_3	1
Nucleus_Accumbens	1
Amygdala	1
Septal_nucleus	1
Area_31a	2
Area_31pd	2
Area_31p_ventral	2
Area_7m	2
Area_dorsal_23_a+b	2
Dorsal_Transitional_Visual_Area	2
PreCuneus_Visual_Area	2
Parieto-Occipital_Sulcus_Area_1	2
Parieto-Occipital_Sulcus_Area_2	2
RetroSplenial_Complex	2
Area_ventral_23_a+b	2
Area_10r	3
Area_10v	3
Area_a24	3
Area_p32	3
Area_s32	3
Area_10d	3
Polar_10p	3
Area_11l	3
Area_anterior_10p	3
Orbital_Frontal_Complex	3
Area_posterior_10p	3
Area_33_prime	4
Area_8BM	4
Area_9_Middle	4
Area_anterior_32_prime	4
Area_dorsal_32	4
Area_posterior_24	4
Area_p32_prime	4
Area_IFJa	4
Area_IFJp	4
Area_8Ad	4
Area_46	5
Area_8Av	5
Area_8B_Lateral	5
Area_9_anterior	5
Area_9_Posterior	5
Area_anterior_9-46v	5
Inferior_6-8_Transitional_Area	5
Area_posterior_9-46v	5
Superior_6-8_Transitional_Area	5
Superior_Frontal_Language_Area	5
Putamen	6
Caudate	6
Globus_pallidus_externalis	6
Globus_pallidus_internalis	6
Substantia_nigra_pars_compacta	6
Substantia_nigra_pars_reticulata	6
Ventral_tegmenta_area	6
