# Supplementary material
Source: Research Square preprint supplement (doi:10.21203/rs.3.rs-9179108/v1)
Supplement: Supplementary file 3 [file 42d05c5cd9be37df11be8455.xlsx]

## Sheet: cTIV_MEAN
Corrected Structural Mean
RegionName	Dimension 1	Dimension 2	Dimension 3	Dimension 4	Dimension 5	Dimension 6	Dimension 7	Dimension 8	Dimension 9
ParaHippocampal_Area_3	0.618625	0.000712151	-0.0162774	0	0	0	0	0	0
ParaHippocampal_Area_2	0.593671	0.00934079	0	0	0	0.0173954	-0.00258201	0	0
Entorhinal_Cortex	0.523113	0	0	0	0	0	0	0	0
ParaHippocampal_Area_1	0.469074	0.0110112	0	0.0133867	0	0.0145601	0.0301155	0.0160941	0.0214616
Amygdala	0.446577	0.0114966	0	0.0081353	0	0.0113706	0	0	0.125929
Perirhinal_Ectorhinal_Cortex	0.411714	0	0.00729301	0.0126611	0	0	0.00847618	0	0
Hippocampus	0.349403	0.0493779	0	0	0	0	0	0	0.0300778
PreSubiculum	-0.385546	0.0428785	0.148706	0	0.014612	-0.0288868	0.00588269	0	0
Area_dorsal_23_a+b	0.000199107	0.6547	0.00109053	0.00824094	0	0.00629332	0	0	0
Area_31pd	0.00422348	0.608921	0	0	0.00356008	0.007681	0	0	0
Area_31p_ventral	0.00269466	0.553202	0	0	-0.00190225	0	0	0	0
Area_31a	0.00785728	0.451234	0.0108131	0.00871982	0.0073429	0	0.00843958	0.00809261	0
Area_7m	0	0.387266	0.0323629	0.00278104	0	0.028819	0	0	0
PreCuneus_Visual_Area	0.0108974	0.360262	0	0.00680333	0.0184805	0	0	0	0
Area_ventral_23_a+b	0.0111462	0.344621	0.137599	0	0	0.0389307	0	0.0122736	0
RetroSplenial_Complex	-0.0105145	0.331676	0	0	0.0489997	0.0207761	0.0358387	0.00511923	0.00699235
Area_23d	0.011366	0.222101	0.00455344	0.0371611	0.162796	0.00319844	0.0333137	0.0353144	0
Dorsal_Transitional_Visual_Area	0	0.013496	0.589401	0	0.0312014	0.0214022	0.00899528	0	0
Parieto-Occipital_Sulcus_Area_1	-0.0129347	0.0247646	0.582299	0.0157267	0.0231235	0.000989981	0	0	0
Parieto-Occipital_Sulcus_Area_2	0	0.0303593	0.533529	0.0150896	0.00480852	0.0124765	0	0	0
ProStriate_Area	-0.120586	0.0941885	0.178038	0	0	0	0	0	0
Area_10r	0	0	0	0.572574	-0.0361645	0.00599507	0	0	0
Area_10v	0	0	0	0.563661	0.00655472	0.0631195	0	0	0
Polar_10p	0.0118281	0.00655553	0	0.457854	0.00250144	0.162452	0	0.00734981	0
Area_s32	0.00760006	0.0172503	0	0.408926	0.115923	0.0194456	0.0155449	0.0131651	0
Area_p32	0	0	0.00840896	0.389915	0.0657171	0.0284422	0.00710669	0	0
Area_posterior_10p	0.012506	0.0113516	0.00237989	0.347998	0	0.0145292	0.0503153	0.0729859	0.00937415
Area_anterior_10p	0	0.0210729	0	0.336702	0.00883118	0.0926732	0.044992	0	0
Area_10d	0	0.00515542	0.0232112	0.288507	0.112165	0.00382474	0.00591364	0.111054	0.0105571
Anterior_24_prime	0	0	0	0	0.641088	0	0	0	0
Area_posterior_24	0	0	0	0	0.515487	0.0247065	0	0	0
Area_a24	0	0.0063071	0	-0.0285972	0.509925	0.00713556	0.0095611	0	0
Area_p32_prime	0	0	0.0282793	0.00467342	0.487515	0	0.00757438	0.0141571	-0.00739513
Area_dorsal_32	0	0	0.00474946	0.00960842	0.483763	0.0157991	0.0327425	0	0
Area_anterior_32_prime	0	0	0	0.0203774	0.464523	0	0.0109672	0	0
Area_33_prime	-0.0142819	0.0474804	0	0	0.364328	0	0.000439728	0	0
Area_8BM	0	0.0213092	0	0.0152196	0.361742	0.00190513	0.0569293	0.154378	0
Area_Posterior_24_prime	0	0.161441	0.0200502	0.0068578	0.306063	0.005909	0.0369789	0.00170445	0
Area_9_Middle	0	0	0	0.125642	0.234944	0.0371588	0.073236	0.128364	0.00622292
Area_25	0	0.00468453	0.0151806	0.134486	0.231938	0.15013	0.00704085	0.00123142	0.1187
Area_47s	0.0236733	0.0136293	0.0010674	0.000518937	0	0.510637	0	0.0176976	-0.00607875
Area_47m	-0.0137986	0.0205279	0	0.00708354	0	0.441446	0.0124532	0.00409387	-0.00101729
Area_anterior_47r	0	0.0112038	0	0.139261	0.00685824	0.420639	0.00416186	0	0.0104401
Area_47l_(47_lateral)	0	0.0146446	0	0.000621163	0	0.393894	0.121145	0.023883	-0.000835401
Area_posterior_47r	0	0	0	0.00945401	0	0.391392	0.0717093	0.0036204	0.000853536
Area_13l	-0.0120831	0.00439291	0	0.0334038	0.00119043	0.380835	0.0347219	0.0140079	0
Area_11l	0	0	0.015797	0.105399	0.0429627	0.368497	0.0182358	0.0179562	0
Posterior_OFC_Complex	0.0681348	0.0232877	0.020731	0	0.0996311	0.332839	0.00823891	0	0.0169259
Area_anterior_9-46v	0	0.00721805	0	0.0362794	0.0393754	0.284112	0.241526	0	0.00779232
Orbital_Frontal_Complex	0	0.00462605	0	0.0495718	0.0367168	0.221412	0	0.0068045	0.00975575
Area_IFSp	0	0	0	0	0	0	0.544819	0.0181554	-0.00249401
Area_posterior_9-46v	0	0.000648272	0	0.0259073	0.0399199	0.0473704	0.515798	0.0151139	0
Area_8Av	0.00201812	0.0205517	0	0.000345887	0.0604047	0.00973826	0.442842	0.0205042	0.00657619
Area_IFJp	-0.00800887	0	0	0	0.00882884	0.00193456	0.44232	0	0
Area_8C	0	0.0068194	0	0.00921134	0.0296403	0.0164672	0.425301	0.0271876	0
Area_46	0	0	0	0.00865951	0.0329966	0.0882324	0.421012	0.0197073	0.0188662
Area_IFJa	0	0	0	0	0.0119868	0.0117186	0.40814	0.0313262	-0.00149816
Area_45	0.0130054	0.0291281	0	0	0	0.16571	0.340621	0.00616169	0.0139399
Area_IFSa	0	0.00117566	0	0.0102078	0.01625	0.114545	0.324968	0.0138303	0
Area_44	0.00952652	0.0112902	0	0.0017781	0.0159575	0.00349965	0.289651	0	0.0178663
Inferior_6-8_Transitional_Area	0.00801973	0.00610818	0.0014401	0	0.00576846	0.0186737	0.23971	0.101129	0.0126223
Area_9-46d	0.00394379	0	0.0086114	0.0693461	0.00618711	0.0529317	0.17279	0.147272	0.0069086
Superior_6-8_Transitional_Area	0	0	0	0	0	0.0238541	0.0713302	0.55578	0.00161905
Area_8B_Lateral	0	0.0166301	0	0.000273408	0.0773557	0.0174256	0	0.441879	0.00659545
Area_9_Posterior	9.56044e-05	0.00777291	0	0	0.0314125	0	0.104595	0.434987	0.0154762
Superior_Frontal_Language_Area	0	0.0131783	0	0.0119748	0.105927	0.0181728	0.0066688	0.394523	0
Area_9_anterior	0.013682	0.00609045	0	0.155524	0.0479169	0.000732297	0.0986274	0.301718	0.0110295
Area_8Ad	0	0.0100132	0	0.0196725	0	0.0223923	0.0810445	0.299117	0.00335467
Nucleus_Accumbens	0.0490114	0	0	0.00891192	0.0238225	0.0323843	0.0396078	0.00220768	0.604911
Globus_pallidus_externalis	0	0	0	0	0	0	0	0	0.532906
Substantia_nigra_pars_compacta	0	0	0	0	0	0	0	0	0.454492
Globus_pallidus_internalis	0	0	0	0	-0.00671977	-0.000989653	-0.00140631	0	0.400972
Substantia_nigra_pars_reticulata	0	0	0	0	0	-0.00672632	-0.00454149	0	0.39927
Putamen	0.022837	0.00640544	0	0	0	0	0.00746338	0	0.32145
Caudate	0.0352854	0	0	0	0	0	0	0.0274578	0.25592
Septal_nucleus	0.0504837	0	0	0.0100365	0.0896914	0.0121401	0.0272014	0.00983595	0.204903
Ventral_tegmenta_area	0	0	0	0	0	0	0	0	0.141402

## Sheet: cTIV_MEAN_bootstrap
Corrected Structural Mean after bootstrap
RegionName	Dimension 1	Dimension 2	Dimension 3	Dimension 4	Dimension 5	Dimension 6	Dimension 7	Dimension 8	Dimension 9
ParaHippocampal_Area_3	0.617964	0	0	0	0	0	0	0	0
ParaHippocampal_Area_2	0.605607	0.0125783	0	0	0	0	-0.00205009	0	0
Entorhinal_Cortex	0.522488	0	0	0	0	0	0	0	0
ParaHippocampal_Area_1	0.466796	0.0101418	0	0.0140325	0.000394472	0.0185535	0.0275462	0.0176758	0.0225826
Amygdala	0.444998	0.0123301	0	0.00688333	0	0.0140822	0	0	0.124636
Perirhinal_Ectorhinal_Cortex	0.411049	0	0.00641244	0.0129948	0	0	0.00839755	0	0
Hippocampus	0.349782	0.0495311	0	0	0	0	0	0	0.0308765
PreSubiculum	-0.394812	0.0555741	0.0507593	0	0.0113496	0.0135198	0.00434214	0	0
Area_dorsal_23_a+b	0.000255884	0.655711	0.0013333	0.00713128	0	0.00737439	0	0	0
Area_31pd	0.00573183	0.610129	0	0	0.00704561	0	0	0	0
Area_31p_ventral	0.00320967	0.552755	0	0	-0.00165236	0	0	0	0
Area_31a	0.00851966	0.449974	0.0115754	0.00857433	0.00749168	0	0.00914231	0.0082838	0
Area_7m	0.00126182	0.391356	0.0324509	0.00590667	0.00507644	0.00610651	0	0	0
PreCuneus_Visual_Area	0.0114086	0.359708	0	0.00681759	0.0188617	0	0	0	0
Area_ventral_23_a+b	-0.00394718	0.351047	0.0548983	0	0	0.0448908	0	0.0120081	0
RetroSplenial_Complex	-0.010029	0.332389	0	0	0.0495206	0.0231332	0.0347374	0.00415317	0.00693046
Area_23d	0.0116861	0.221495	0.00458147	0.0368908	0.162433	0	0.0378206	0.0363462	0
Dorsal_Transitional_Visual_Area	0	0.0140817	0.637596	0	0.0370087	0.0164174	0.00369371	0	0
Parieto-Occipital_Sulcus_Area_2	0	0.0318048	0.576217	0.0195162	0.00525659	0	0	0	0
Parieto-Occipital_Sulcus_Area_1	-0.0394686	0.0504413	0.444197	0.014063	0.0229497	0.00405588	0	0	0
Area_10r	0	0	0	0.570618	-0.0351965	0.00547882	0	0	0
Area_10v	0	0	0	0.569264	0.00799297	0.0395357	0.000816376	0	0
Polar_10p	0.012145	0.00850737	0	0.460058	0.00971691	0.140304	0	0.00823505	0
Area_s32	0.00643319	0.0164841	0	0.40733	0.120604	0.023293	0.0208275	0.0131778	0
Area_p32	0	0	0.00829668	0.388132	0.0679602	0.022291	0.015048	0	0
Area_posterior_10p	0.0131149	0.0114765	0.00406758	0.355846	0	0	0.0340477	0.0895711	0.0116267
Area_anterior_10p	0	0.0216954	0	0.343291	0.00973523	0.100044	0.0320352	0	0
Area_10d	0	0.00486213	0.0228979	0.288127	0.111513	0.00411026	0.0102767	0.112047	0.0105208
Anterior_24_prime	0	0	0	0	0.639995	0	0	0	0
Area_posterior_24	0	0	0	0	0.517015	0.0210442	0	0	0
Area_a24	0	0.00629153	0	-0.026606	0.516668	0.00795302	0.00964092	0	0
Area_p32_prime	0	0	0.0275028	0.00478348	0.486673	0	0.00755407	0.0141362	-0.00742907
Area_dorsal_32	0	0	0.00541198	0.010399	0.486118	0.00238641	0.0405522	0	0
Area_anterior_32_prime	0	0	0	0.0201125	0.462972	0	0.0144506	0	0
Area_33_prime	-0.010699	0.0482628	0	0	0.363736	0	0.000653665	0	0
Area_8BM	0	0.0214496	0	0.0144377	0.360977	0.00181018	0.0595343	0.15335	0
Area_Posterior_24_prime	0	0.161339	0.0196918	0.00835232	0.305873	0	0.040322	0.00205491	0
Area_25	0	0.0134839	0.0189559	0.149119	0.240588	0.0182449	0.0105499	0.00258826	0.132164
Area_9_Middle	0	0	0	0.12487	0.235529	0.0305745	0.0794046	0.132239	0.0063465
Area_47m	-0.00567308	0.0216405	0	0.00563046	0	0.49913	0.0143532	0.00401762	-0.000676867
Area_47s	0.0287443	0.0188842	0.00401378	0.0146245	0.0025314	0.468733	0	0.0228575	-0.00605232
Area_13l	-0.00623458	0.00425825	0	0.0338526	0.003562	0.427648	0.034397	0.0131332	0
Area_11l	0	0	0.016247	0.103697	0.0457364	0.414402	0.0187374	0.0175504	0
Area_47l_(47_lateral)	0	0.0146432	0	0.00440392	0	0.398344	0.138932	0.0314442	-0.000840766
Area_anterior_47r	0	0.0146842	0	0.153544	0.0221332	0.333277	0.0577827	0	0.0129893
Area_posterior_9-46v	0	0.000817144	0	0.0387671	0.0449142	0.00499317	0.5455	0.0201194	0
Area_IFSp	0	0	0	0	0	0	0.541323	0.0176777	-0.00257372
Area_8Av	0.00249003	0.0205831	0	0.00291032	0.0606676	0.00271176	0.451473	0.021324	0.00688102
Area_IFJp	-0.00609004	0	0	0	0.00634863	0.0139492	0.439471	0	0
Area_8C	0	0.00693337	0	0.0119588	0.0308627	0.0182738	0.411653	0.0338118	0
Area_IFJa	0	0	0	0	0.0115311	0.0133071	0.407563	0.0308054	-0.001595
Area_IFSa	0.00148015	0.00588417	0	0.0250634	0.0315304	0.0148712	0.362952	0.0177706	0.00305211
Area_45	0.0130314	0.0291272	0.00145496	0	0	0.149927	0.355519	0.00865161	0.0184424
Area_46	0	0	0	0.0346891	0.0479374	0.0429973	0.347479	0.0543725	0.0237218
Area_44	0.00924245	0.0112112	0	0.00185467	0.0162518	0.00442181	0.287946	0	0.0183527
Inferior_6-8_Transitional_Area	0.00800056	0.00580202	0.00249908	0	0.00619104	0.0203383	0.232221	0.104561	0.0130324
Superior_6-8_Transitional_Area	0	0	0	0	0	0.026858	0.0652371	0.555331	0.00214984
Area_9_Posterior	0.00062797	0.00817253	0	0	0.0320973	0	0.0873787	0.449196	0.0160817
Area_8B_Lateral	0	0.0160199	0	3.61055e-06	0.0780349	0.0204832	0	0.43893	0.00665385
Superior_Frontal_Language_Area	0	0.0128257	0	0.0123855	0.10618	0.0179004	0.00659927	0.392252	0
Area_9_anterior	0.0145706	0.00708099	0	0.171635	0.051664	0.00562573	0.036069	0.319493	0.0140416
Area_8Ad	0	0.00986474	0	0.0211686	0	0.0160227	0.083679	0.29726	0.00378216
Nucleus_Accumbens	0.0502106	0	0	0.0110248	0.0327691	0	0.0459448	0.00393562	0.605819
Globus_pallidus_externalis	0	0	0	0	0	0	0	0	0.532738
Substantia_nigra_pars_compacta	0	0	0	0	0	0	0	0	0.454415
Globus_pallidus_internalis	0	0	0	0	-0.0067414	-0.000681065	-0.00148366	0	0.400866
Substantia_nigra_pars_reticulata	0	0	0	0	0	-0.00693584	-0.00466967	0	0.399185
Putamen	0.0226654	0.00634078	0	0	0	0	0.00851424	0	0.321481
Caudate	0.035136	0	0	0	0	0	0.00101597	0.0271297	0.255954
Septal_nucleus	0.0498196	0	0	0.00997617	0.0929204	0.0130699	0.0244556	0.0129537	0.20548
Ventral_tegmenta_area	0	0	0	0	0	0	0	0	0.141378

## Sheet: non-cTIV_MEAN
Non-corrected Structural Mean
RegionName	Dimension 1	Dimension 2	Dimension 3	Dimension 4	Dimension 5	Dimension 6	Dimension 7	Dimension 8	Dimension 9
ParaHippocampal_Area_3	0.620792	0.00182536	0	0	0	0.000570201	0	0	0
Entorhinal_Cortex	0.545492	0.0216053	0	0	0	0.015293	0.00268124	0	0.0378228
ParaHippocampal_Area_2	0.533657	0.00492166	0	0	0	0.0273866	0	0	0
ParaHippocampal_Area_1	0.457742	0.0167813	0	0.0119947	0.0036484	0.0203191	0.0299487	0.0227438	0.0276979
Amygdala	0.448195	0.0183209	0.0223125	0.000590499	0.00593806	0.0361972	0	0	0.130952
PreSubiculum	0.436705	0.0490538	0.0314632	0	0.00869095	0.0234447	0.00634556	0	0.0110823
Perirhinal_Ectorhinal_Cortex	0.419153	0.0143665	0.0297565	0.0151535	0.0125943	0.0220821	0.00147606	0.018303	0
Hippocampus	0.352242	0.0677291	0	0	0	0	0	0	0.0554775
ProStriate_Area	-0.124849	0.0749457	0.113012	0	0	0	0	0	0
Area_dorsal_23_a+b	0	0.631267	0	0.00619023	0	0.00421654	0	0.00178088	0.00127641
Area_31pd	0	0.584423	0	0	0	0.00358142	0	0	0
Area_31p_ventral	0	0.529138	0	0	0	0	0	0	0
Area_31a	0.0113193	0.45105	0.0194237	0.00969523	0.0124816	0.0043616	0.0146956	0.0159732	0.00365153
Area_7m	0.0137156	0.394753	0.0424633	0.00367393	0.00518423	0.051998	0	0.0009375	0
PreCuneus_Visual_Area	0.0239538	0.380857	0.00366856	0.00847226	0.0262737	0.0134467	0	0	0.000391651
Area_ventral_23_a+b	-0.0419699	0.349621	0.0395358	0	0.00164252	0.0483813	0.00119314	0.0145446	0
RetroSplenial_Complex	0.0925404	0.325834	0.00108645	0	0.0420527	0.0298383	0.0364259	0.010527	0.0150404
Area_23d	0.0191041	0.23021	0.00977896	0.0372999	0.158124	0.0054451	0.00429083	0.0717846	0
Dorsal_Transitional_Visual_Area	0	0.016114	0.610474	0	0.0325958	0.0200068	0	0.0102956	0
Parieto-Occipital_Sulcus_Area_2	0.0224061	0.051495	0.566723	0.0181233	0.010254	0.0270732	0	0	0.00690422
Parieto-Occipital_Sulcus_Area_1	-0.0486426	0.0364565	0.441954	0.0139902	0.0346449	0.00954895	0	0.00261322	0
Area_10v	0.000558603	0	0	0.550855	0.00898793	0.0852131	0	0.00194922	0
Area_10r	0	0	0	0.539912	0	0.0030611	0	0	0
Polar_10p	0.014335	0.0124902	0	0.438707	0.00515115	0.170914	0	0.00852249	0.00081197
Area_s32	0	0.0136416	0	0.402124	0.103462	0.0295078	0.0175271	0.0132421	0
Area_p32	0	0	0.00527996	0.394316	0.0643021	0.0285578	0.00732332	0.00418824	0
Area_posterior_10p	0.0113468	0.0132388	0.00338712	0.341825	0	0.0161487	0.0168625	0.116258	0.00883988
Area_anterior_10p	0	0.0179231	0	0.319315	0.00682898	0.0907025	0.00119973	0.0487008	0
Area_10d	0	0.00502712	0.0254668	0.290302	0.1051	0.011415	0.00829951	0.106462	0.0126227
Anterior_24_prime	0	0	0	0	0.601841	0	0	0	0
Area_posterior_24	0	0	0	0	0.515801	0.0248844	0	0	0
Area_p32_prime	0	0	0.0322473	0.00865506	0.482427	0.00209814	0	0.0292932	0
Area_a24	0	0.00450558	0	0.00700184	0.479005	0.00156528	0	0.00747751	0
Area_dorsal_32	0.00357995	0.00312543	0.0112864	0.0101243	0.474805	0.0240605	0.0320616	0.0131102	0
Area_anterior_32_prime	0.00292981	0.00218019	0	0.0189212	0.472325	0.000451441	0.0012034	0.0185453	0
Area_Posterior_24_prime	0	0.154281	0.0262923	0.00932289	0.311111	0.00995123	0.00608453	0.0396007	0
Area_33_prime	0.00852789	0.0416097	0	0	0.305894	0	0	0	-0.00266534
Area_8BM	0.012358	0.0228681	0	0.0140911	0.275265	0.00471975	0.0146642	0.195677	0
Area_9_Middle	0	0	0	0.11657	0.235081	0.0434548	0.0488261	0.155977	0.0114731
Area_25	0.00289684	0.0145993	0.015614	0.120096	0.22537	0.16028	0.00476184	0.0062309	0.118195
Area_47s	0.0515738	0.0228771	0.0118403	0.0046325	0	0.495166	0	0.0240726	-0.0118421
Area_47m	0.00881123	0.0215847	0	0.00864726	0	0.435498	0.0136363	0.00813678	0
Area_anterior_47r	0.00121921	0.0220126	0.00539839	0.140593	0.0134554	0.405759	0.00592436	0.0114865	0.0146423
Area_47l_(47_lateral)	0	0.0175567	0	0.00558233	0.000425753	0.389966	0.124365	0.0274497	-0.00484089
Area_posterior_47r	0	0.000327047	0	0.0131377	0	0.382516	0.0925745	0.0102852	0.00473337
Area_13l	0.0159398	0.0113571	0	0.0409237	0.00147621	0.371371	0.0230096	0.0443669	0
Area_11l	0.0244288	0.00310857	0.0180556	0.10375	0.0604606	0.351093	0	0.0423616	0
Posterior_OFC_Complex	0.0258714	0.0219258	0.0235881	0	0.0941132	0.333886	0.0209307	0.000969213	0.024357
Area_anterior_9-46v	0	0.00920192	0	0.0477439	0.043103	0.263044	0.106294	0.138646	0.00656457
Orbital_Frontal_Complex	0.00661055	0.0205387	0	0.0610355	0.0429842	0.213842	0	0.0150519	0.0347699
Area_IFSp	0	0	0	0	0	0	0.507423	0.00740041	-0.00759652
Area_IFJa	0.00143	0	0	0	0.0156716	0.0175805	0.488381	0.0349849	0
Area_45	0.011417	0.028883	0	0.000625315	0	0.166367	0.377224	0.0119056	0.0128034
Area_posterior_9-46v	0	0.000603208	0	0.0321136	0.0420652	0.0536255	0.37114	0.166799	0
Area_IFSa	0	0	0	0.0106574	0.0141673	0.111235	0.370055	0.0164953	0
Area_IFJp	0.00378911	0	0	0	0.00187802	0.00672162	0.319702	0.138209	0
Area_44	0.0195738	0.0216086	0	0.00506347	0.0243782	0.0185579	0.303642	0.0163166	0.0272252
Superior_6-8_Transitional_Area	0	0	0	0.00117618	0	0.0340215	0.00214683	0.546093	0.00755501
Area_9_Posterior	0	0.00738808	0	0	0.0333723	0	0.0179818	0.465263	0.0149821
Area_8Av	0.00555852	0.0209102	0	0.00202227	0.0667283	0.014973	0.0147482	0.445105	0.0138801
Area_8B_Lateral	0	0.0211811	0	0.00486703	0.082315	0.0232235	0	0.369243	0.0116709
Area_9_anterior	0.0119103	0.00684323	0	0.154196	0.0479041	0.00294631	0.00274096	0.353147	0.0125014
Superior_Frontal_Language_Area	0	0.0186698	0	0.0159423	0.110092	0.028979	0.00635876	0.333616	0
Inferior_6-8_Transitional_Area	0.0175908	0.00972976	0.0059268	0	0.011685	0.0238164	0.0420508	0.312821	0.0165886
Area_9-46d	0.00347028	0	0.00768824	0.0721147	0.0113061	0.0539648	0.0241667	0.305138	0.00697805
Area_46	0	0.00228671	0	0.0131286	0.0459441	0.092625	0.0672317	0.295738	0.0297614
Area_8C	0	0.0136972	0	0.0112531	0.0363581	0.0284656	0.172013	0.283631	0
Area_8Ad	0	0.00866595	0	0.022313	0	0.0244429	0.0617446	0.281401	0.000536717
Globus_pallidus_externalis	0.00476911	0	0.00133052	0	0	0.00484312	0	0	0.560243
Nucleus_Accumbens	0.0781185	0.00117254	0	0.0103438	0.0277777	0.048097	0.0109778	0.0486809	0.558343
Substantia_nigra_pars_compacta	0.0100847	0	0	0	0	0	0	0	0.468162
Globus_pallidus_internalis	0	0	0	0	0	0	0	0	0.376909
Substantia_nigra_pars_reticulata	0	0	0	0	-0.00247179	-0.016405	-0.015869	0	0.368042
Putamen	0.0503616	0.0138	0.00572881	0	0	0	0.0134725	0.00960379	0.33366
Caudate	0.0404468	0	0	0	0	0	0	0.0338674	0.273139
Septal_nucleus	0.055575	0.00371008	0	0.011083	0.0924744	0.0207612	0.0243885	0.018803	0.210212
Ventral_tegmenta_area	0	0	0	0	0	0.00994834	0	0	0.146826

## Sheet: fMRI_MEAN
Functional Mean
RegionName	Dimension 1	Dimension 2	Dimension 3	Dimension 4	Dimension 5	Dimension 6	Dimension 7	Dimension 8
ParaHippocampal_Area_1	0.553802	0	0	0	0	0	0	0
ParaHippocampal_Area_3	0.420947	0	0	0	0	0	0	0
Hippocampus	0.283121	0	0	0	0.0565817	0	0	0
ParaHippocampal_Area_2	0.174621	0	0	0	0	0	0	0
PreSubiculum	0.0527296	0.00128924	0	0	0	0	0	0
Area_7m	0	0.539412	0.0154517	0	0	0	0	0
Parieto-Occipital_Sulcus_Area_1	0	0.522769	0	0	0	0	0	0
Area_dorsal_23_a+b	0	0.450029	0.0353144	0	0	0	0	0.041459
Area_31pd	0	0.423096	0.0842563	0	0	0	0	0
Area_31p_ventral	0	0.368816	0.0232136	0	0	0	0	0
Area_ventral_23_a+b	0	0.291941	0	0	0	0	0	0
PreCuneus_Visual_Area	0	0.268338	0.0191267	0	-0.0186342	0	0	0
RetroSplenial_Complex	0.00177843	0.262331	0.122795	0	0	0	0	0
Parieto-Occipital_Sulcus_Area_2	0	0.208925	0	0	0	0	0	0
Area_31a	0	0.204152	0.0173992	0	0	0	0	0
Dorsal_Transitional_Visual_Area	0	0.0559377	0	0	0	0	0	0
ProStriate_Area	0	0.0110039	0	0	0	0	0	0
Entorhinal_Cortex	0	-0.289487	-0.122961	0.00136702	0.0676387	0	0	0
Perirhinal_Ectorhinal_Cortex	0	-0.403056	-0.0905215	0	0	0	0.00677212	0
Area_posterior_24	0	0.00159915	0.733443	0	0	0	0.0345894	0
Area_IFJa	0	0	0.424137	0	0	0	0	0
Anterior_24_prime	0	0.0707276	0.401906	0	-0.011349	0	0	0
Area_33_prime	0	0.204717	0.395516	0	0	0	0	0
Area_Posterior_24_prime	0	0.00980462	0.379256	0	0	0	0	0
Area_anterior_32_prime	0	0.0286085	0.37373	0	0	0	0.0234028	0
Area_dorsal_32	0	0.0231125	0.369395	0	0	0	0.0146835	0
Area_IFSa	0	0	0.351202	0.0077046	0	0.0307643	0.0374348	0
Area_p32_prime	0	0.0506702	0.318791	0	0	0	0.0014401	0
Area_posterior_47r	0	0	0.301721	0	0	0.242118	0.0261413	0
Area_8BM	0	0	0.275268	0	0	0	0	0
Area_IFSp	0	0	0.268501	0	0	0	0.0648528	0
Area_8C	0	0	0.258413	0	0	0	0.0613749	0
Area_9_Middle	0	0	0.251836	0	0	0	0.103841	0
Area_23d	0	0.146824	0.228575	0	0	0	0	0
Area_44	0	0	0.167654	0.00568033	0	0.012062	0	0
Area_IFJp	0	0.0168598	0.141659	0	0	0	0.00982155	0
Area_8Ad	0	0	0.0823073	0	0	0	0	0
Area_47m	0	0	0.06556	0.00948919	0	0	0	0.00381367
Area_10v	0	0	0.00249821	0.627675	0	0	0	0
Area_anterior_10p	0	0	0	0.46244	0	0	0	0
Area_10r	0	0	0	0.454803	0	0	0	0
Polar_10p	0	0	0	0.445982	0	0	0	0
Area_a24	0	0	0	0.445624	0.059405	0	0	0
Area_p32	0	0	0	0.444865	0	0	0	0
Area_11l	0	0	0.0156046	0.412548	0	0.0993141	0	0
Area_10d	0	0	0	0.368797	0	0	0	0
Area_posterior_10p	0	0	0.00104337	0.324321	0	0	0	0
Area_13l	0	-0.00146417	0	0.307935	0.110344	0	0	0
Area_s32	0	0	0	0.25634	0.0899423	0	0	0
Orbital_Frontal_Complex	0	0	0.00438398	0.152754	0	0.0671001	0	0
Area_47s	0	0	0	0.088856	0.025093	0	0	0
Nucleus_Accumbens	0	0	-0.00687294	0.0271477	0.661207	0	0	0
Posterior_OFC_Complex	0	-0.0174459	-0.0033318	0.0729588	0.56093	0	0	0
Septal_nucleus	0	0	0	0	0.341957	0	0	0
Area_25	0	0	0	0.101267	0.338338	0	0	0
Amygdala	0.0730737	-0.0633254	0	0.0475583	0.170044	0	0	0.0274192
Area_47l_(47_lateral)	0	0	0.0454191	0.0261974	0	0.520409	0.00790363	0
Area_45	0	0	0.0358264	0.00906102	0	0.319813	0.0349478	0
Area_anterior_47r	0	0	0.072775	0.0521856	0	0.200596	0.00973804	0
Area_8Av	0	0	0	0	0	0.0119625	0.565361	0
Area_46	0	0	0	0	0	0	0.55562	0
Superior_6-8_Transitional_Area	0	0	0	0	0	0	0.436592	0
Area_8B_Lateral	0	0	0.0330534	0	0	0.0307383	0.417155	0
Area_9_Posterior	0	0	0	0	0	0	0.393669	0
Area_posterior_9-46v	0	0	0.0958647	0	0	0	0.306521	0
Area_anterior_9-46v	0	0	0.00150958	0	0	0.0512061	0.257727	0
Inferior_6-8_Transitional_Area	0	0	0	0	0	0	0.248608	0
Area_9_anterior	0	-0.00680583	0	0	0	0	0.210526	0
Superior_Frontal_Language_Area	0	0	0	0	0	0	0.187095	0
Area_9-46d	0	0	0.234015	0	0	0	0.157145	0
Globus_pallidus_internalis	0	0	0	0	0	0	0	0.50434
Substantia_nigra_pars_compacta	0	0	0	0	0	0	0	0.502318
Substantia_nigra_pars_reticulata	0	0	0	0	0	0	0	0.466923
Globus_pallidus_externalis	0	0	0	0	0	0	0	0.443184
Putamen	0	0	0.00338589	0	0	0	0	0.279814
Ventral_tegmenta_area	0	0	0	0	0.0270732	0	0	0.140133
Caudate	0	0.0383255	0	0	0	0	0	0.113501

## Sheet: fMRI_MEAN_bootstrap
Functional Mean after bootstrap
RegionName	Dimension 1	Dimension 2	Dimension 3	Dimension 4	Dimension 5	Dimension 6
ParaHippocampal_Area_1	0.521639	0	0	0	0	0
Nucleus_Accumbens	0.463912	-0.0183378	0.018237	-0.0380562	0	0
Hippocampus	0.38832	0	-0.0149102	-0.024541	0	0.0313574
ParaHippocampal_Area_3	0.380044	0	0	0	0	0.0146757
Septal_nucleus	0.355019	0	0	0	0	0
Amygdala	0.258069	-0.0441593	0.059551	-0.0225566	0	0.0637101
ParaHippocampal_Area_2	0.203116	0	0	0	0	0
PreSubiculum	0.0833644	0.0370468	0	0	0	0
Area_7m	0	0.579237	0	0.00760361	-0.00687591	0
Parieto-Occipital_Sulcus_Area_1	-0.00650109	0.565805	-0.00375233	0	-0.00351708	0
Area_dorsal_23_a+b	0	0.498283	0	0.00754	0	0.0634718
Area_31p_ventral	0	0.435716	0	0	0	0.00642624
Area_31pd	0	0.412923	0	0.128438	-0.0126047	0.0199035
Area_ventral_23_a+b	0	0.352522	0	0.0113529	0	0
RetroSplenial_Complex	0.0419496	0.304069	0	0.141098	-0.0168447	0
PreCuneus_Visual_Area	-0.0255564	0.283802	-0.0114063	0	0	0
Parieto-Occipital_Sulcus_Area_2	-0.0387104	0.276074	-0.000172649	0	0	0
Area_31a	0	0.263965	0	0	0	0
Dorsal_Transitional_Visual_Area	0	0.12799	0	0	0	0
Area_10v	0	0	0.652385	0.00664769	0	0
Area_anterior_10p	-0.00130207	0	0.490305	0	0	0
Area_a24	0.0933306	0	0.474321	0	0	0
Area_p32	0	0	0.461104	0.0349651	0	0
Polar_10p	-0.0165873	0	0.456652	0	0	0
Area_10r	0	0	0.454375	0	0	0.00462509
Area_11l	0	0	0.399371	0	0	0
Area_10d	0	0	0.393215	0	0	0
Area_posterior_10p	0	0	0.363655	0.00465647	0.0306589	0
Area_s32	0	0	0.296313	0	0	0
Orbital_Frontal_Complex	0	-0.0162448	0.186187	0	0	0
Area_posterior_24	0	0.00156031	0.00819817	0.669878	0	0.00996145
Area_dorsal_32	-0.00784416	0.0278244	0	0.437011	0	0
Area_IFJa	0	0	0.00617401	0.405595	0	0.015658
Area_anterior_32_prime	-0.0497092	0.0123475	0	0.405526	0	0
Area_33_prime	-0.0099884	0.185905	0	0.403982	0	0
Area_p32_prime	0	0.0565691	0	0.381141	0	0
Area_8BM	-0.0147611	0	0	0.356123	0.00316479	0
Area_9_Middle	0	0	0.00432468	0.266715	0.146792	0
Area_IFJp	-0.0125853	0.00711428	0.0242755	0.229629	0	0
Area_8Ad	0	0	0	0.168188	0	0
Area_8Av	0	-0.00264302	0	0.00323577	0.601964	0
Area_46	0	0	0	0	0.563942	0
Superior_6-8_Transitional_Area	0	0	0	0	0.474105	-0.00621871
Area_8B_Lateral	0	0	0	0.0527371	0.46405	0
Area_9_Posterior	0	0	0	0.0102424	0.436293	0
Area_posterior_9-46v	0	0	0.0242306	0.0286572	0.328111	0
Inferior_6-8_Transitional_Area	0	0	0	0	0.283242	0
Area_9_anterior	0	-0.0374444	0	0.00193293	0.274189	0
Area_anterior_9-46v	0	0	0.00488233	0.0402874	0.242777	0
Superior_Frontal_Language_Area	0	0	0	0.0162265	0.223637	-0.0270862
Substantia_nigra_pars_compacta	0	0	0	0	0	0.56213
Globus_pallidus_internalis	0	0	0	0	0	0.529634
Substantia_nigra_pars_reticulata	0	0	0	0	0	0.488587
Globus_pallidus_externalis	0.0120405	0	0	0	0	0.477375
Putamen	0.0370107	0	0.0041076	0	0	0.356346
Ventral_tegmenta_area	0.0678871	0	0	0	-0.025333	0.168217
Caudate	0	0.0845057	0	0.0244985	-0.0058162	0.153569
